# Supplementary material for: Longitudinal Analysis of Urinary Cytokines and Biomarkers in COVID-19 Patients with Subclinical Acute Kidney Injury
Source: MDPI journal article supplement (doi:10.3390/ijms232315419), 2022-12-06
Supplement: s1 [file s1]

**Supplementary Table S2.** Principal component analysis of cytokines.

| Component | Eigen value | Variance<br>explained | Accumulated<br>variance | Component weight                                                                       |
|-----------|-------------|-----------------------|-------------------------|----------------------------------------------------------------------------------------|
| 1         | 6.48        | 23.17                 | 23.17                   | IFN- $\alpha$ (9.1)<br>EGF (8.9)<br>IL-13 (6.9)<br>VEGF (6.13)<br>Eotaxin (5.85)       |
| 2         | 4.82        | 17.21                 | 40.38                   | IL-1R (13)<br>G-CSF (10.7)<br>IP-10 (10.4)<br>IL-5 (9.6)<br>RANTES (6.6)               |
| 3         | 3.88        | 13.88                 | 54.27                   | IL-10 (11.2)<br>IL 15 (7.65)<br>IL-2R (6.95)<br>IL-4 (6.54)<br>IL-7 (5.6)              |
| 4         | 3.27        | 11.70                 | 65.97                   | IL-12 (8.8)<br>MIP-1 $\beta$ (8.4)<br>IL-8 (7.1)<br>IL-17A (6.3)<br>IL-1 $\beta$ (6.3) |

|   |             |      |       |                       |
|---|-------------|------|-------|-----------------------|
| 5 | <b>2.08</b> | 7.46 | 73.43 | HGF ( <b>23</b> )     |
|   |             |      |       | MCP-1 ( <b>11.8</b> ) |
|   |             |      |       | IL-6 ( <b>10.3</b> )  |
|   |             |      |       | GM-CSF (6.4)          |
| 6 | 1.25        | 4.46 | 77.90 | NA                    |
| 7 | 0.88        | 3.16 | 81.07 | NA                    |

The principal component analysis retained components with eigenvalue >2 and explained >70% of the accumulated variance [42].

Components with eigenvalues >2 are in bold.

Cytokines with a component weight >8 are in bold.

Interferon alpha (IFN- $\alpha$ ); epidermal growth factor (EGF); interleukin (IL); vascular endothelial growth factor (VEGF); IL-1 receptor (IL-1R); granulocyte colony-stimulating factor (G-CSF); interferon-gamma-inducible protein 10 (IP-10); RANTES (regulated on activation, normal T cell expressed and secreted); macrophage inflammatory protein (MIP)-1 $\beta$ ; hepatocyte growth factor (HGF); monocyte chemoattractant protein-1 (MCP-1); granulocyte/macrophage-colony stimulating factor (GM-CSF).
