# Supplementary material for: Longitudinal Analysis of Urinary Cytokines and Biomarkers in COVID-19 Patients with Subclinical Acute Kidney Injury
Source: MDPI journal article supplement (doi:10.3390/ijms232315419), 2022-12-06
Supplement: s1 [file s1]

**Supplementary Table S1.** Imputation of cytokine and chemokine missing values.

| Cytokine or<br>chemokine | Detectable /           | Differences between complete / incomplete data |               |                  |               |               |
|--------------------------|------------------------|------------------------------------------------|---------------|------------------|---------------|---------------|
|                          | Missing*<br>values (%) | Age, years (p)                                 | Men, %/% (p)  | SOFA, points (p) | AKI %/% (p)   | Death %/% (p) |
| FGF, Day 1               | 43/8 (15.6%)           | 53/55 (0.65)                                   | 58/63 (0.81)  | 4/6 (0.20)       | 53/63 (0.63)  | 23/0 (0.12)   |
| FGF, Day 5               | 37/12 (24.4%)          | 52/60 (0.07)                                   | 54/45 (0.44)  | 4/3 (0.22)       | 48/66 (0.27)  | 18/16 (0.86)  |
| IL-1 $\beta$ , Day 1     | 45/6 (11.7%)           | 53/60 (0.23)                                   | 60/50 (0.64)  | 3/6 (0.07)       | 56/50 (0.79)  | 20/13 (0.84)  |
| IL-1 $\beta$ , Day 5     | 44/5 (10.2%)           | 53/70 (0.29)                                   | 56/60 (0.89)  | 3/6 (0.09)       | 50/80 (0.20)  | 18/20 (0.92)  |
| G-CSF, Day 1             | 28/23 (45%)            | 47/56 (0.02)                                   | 68/48 (0.14)  | 3/6 (0.08)       | 54/57 (0.83)  | 18/22 (0.72)  |
| G-CSF, Day 5             | 28/21 (42.8%)          | 52/53 (0.86)                                   | 64/47 (0.24)  | 3/4 (0.56)       | 46/61 (0.28)  | 25/9 (0.16)   |
| IL-10, Day 1             | 19/32 (62.7%)          | 53/53 (0.64)                                   | 74/50 (0.09)  | 4/4 (0.64)       | 63/50 (0.36)  | 26/16 (0.35)  |
| IL-10, Day 5             | 14/35 (71.4%)          | 55/52 (0.15)                                   | 64/54 (0.52)  | 4/4 (0.63)       | 64/48 (0.31)  | 7/22 (0.19)   |
| IL-13, Day 1             | 41/10 (19.6%)          | 53/54 (0.31)                                   | 56/70 (0.42)  | 3/5 (0.23)       | 54/60 (0.71)  | 17/30 (0.35)  |
| IL-13, Day 5             | 38/11 (22.4%)          | 51/56 (0.22)                                   | 55/63 (0.62)  | 4/4 (0.58)       | 47/72 (0.13)  | 15/27 (0.38)  |
| IL-6, Day 1              | 51/0 (0%)              | Complete data                                  | Complete data | Complete data    | Complete data | Complete data |
| IL-6, Day 5              | 48/1 (2.0%)            | 53/56 (0.67)                                   | 56/100 (0.38) | 4/2 (0.21)       | 54/0 (0.28)   | 18/0 (0.63)   |
| IL-12, Day 1             | 37/14 (27.4%)          | 53/54 (0.68)                                   | 54/71 (0.26)  | 4/3 (0.24)       | 57/50 (0.66)  | 19/21 (0.84)  |

|                        |               |               |               |               |               |               |
|------------------------|---------------|---------------|---------------|---------------|---------------|---------------|
| IL-12, Day 5           | 33/16 (32.6%) | 53/54 (0.84)  | 54/62 (0.59)  | 4/3 (0.21)    | 48/62 (0.35)  | 15/25 (0.40)  |
| RANTES Day 1           | 29/22 (43.1%) | 53/53 (0.84)  | 55/64 (0.54)  | 4/3 (0.19)    | 66/41 (0.08)  | 21/18 (0.82)  |
| RANTES Day 5           | 23/26 (53.0%) | 51/55 (0.14)  | 43/69 (0.06)  | 4/4 (0.40)    | 43/61 (0.20)  | 17/19 (0.86)  |
| Eotaxin, Day 1         | 32/19 (37.2%) | 53/53 (0.94)  | 59/58 (0.91)  | 3/4 (0.35)    | 50/63 (0.36)  | 22/16 (0.59)  |
| Eotaxin, Day 5         | 30/19 (38.7%) | 55/52 (0.32)  | 56/57 (0.93)  | 4/3 (0.46)    | 53/52 (0.96)  | 23/10 (0.25)  |
| IL-17A, Day 1          | 22/29 (56.8%) | 47/56 (0.08)  | 64/55 (0.54)  | 3/4 (0.19)    | 50/58 (0.54)  | 23/17 (0.62)  |
| IL-17A, Day 5          | 23/26 (53.0%) | 51/55 (0.11)  | 65/50 (0.28)  | 3/6 (0.11)    | 52/ 53 (0.90) | 26/11 (0.18)  |
| MIP-1 $\alpha$ , Day 1 | 35/16 (31.3%) | 53/54 (0.52)  | 60/56 (0.80)  | 3/4 (0.58)    | 51/62 (0.46)  | 23/13 (0.38)  |
| MIP-1 $\alpha$ , Day 5 | 21/28 (57.1%) | 54/52 (0.39)  | 52/60 (0.56)  | 4/4 (0.64)    | 57/50 (0.62)  | 19/17 (0.91)  |
| GM-CSF, Day 1          | 51/0 (0%)     | Complete data |
| GM-CSF, Day 5          | 49/0 (0%)     | Complete data |
| MIP-1 $\beta$ , Day 1  | 48/3 (5.8%)   | 53/53 (0.84)  | 60/33 (0.35)  | 4/2 (0.08)    | 54/67 (0.67)  | 19/33 (0.53)  |
| MIP-1 $\beta$ , Day 5  | 48/1 (2.0%)   | 53/73 (0.10)  | 56/100 (0.38) | 4/6 (0.42)    | 52/100 (0.34) | 18/0 (0.63)   |
| MCP-1, Day 1           | 51/0 (0%)     | Complete data |
| MCP-1, Day 5           | 49/0 (0%)     | -             | -             | -             | -             | -             |
| IL-15, Day 1           | 37/14 (27.4%) | 54/45 (0.14)  | 62/50 (0.43)  | 4/4 (0.64)    | 57/50 (0.66)  | 24/7 (0.16)   |
| IL-15, Day 5           | 25/24 (48.9%) | 54/53 (0.52)  | 64/50 (0.32)  | 4/3 (0.27)    | 64/4 (0.11)   | 20/16 (0.76)  |

|                        |               |                     |                     |            |               |              |
|------------------------|---------------|---------------------|---------------------|------------|---------------|--------------|
| EGF, Day 1             | 26/25 (49%)   | 45/56 (0.06)        | 65/52 (0.33)        | 3/4 (0.81) | 58/52 (0.68)  | 23/16 (0.52) |
| EGF, Day 5             | 27/22 (44.8%) | 53/53 (0.38)        | 70/40 <b>(0.03)</b> | 3/4 (0.78) | 59/45 (0.33)  | 25/9 (0.13)  |
| IL-5, Day 1            | 31/20 (39.2%) | 51/54 (0.25)        | 55/65 (0.47)        | 4/4 (0.36) | 55/55 (0.99)  | 16/25 (0.43) |
| IL-5, Day 5            | 24/25 (51.0%) | 46/57 <b>(0.01)</b> | 50/64 (0.32)        | 3/4 (0.65) | 54/52 (0.87)  | 20/16 (0.66) |
| HGF, Day 1             | 45/6 (11.7%)  | 53/53 (0.77)        | 56/83 (0.19)        | 4/2 (0.36) | 53/67 (0.53)  | 20/16 (0.84) |
| HGF, Day 5             | 37/12 (24.4%) | 53/53 (0.20)        | 56/58 (0.92)        | 4/3 (0.17) | 56/41 (0.36)  | 18/16 (0.86) |
| VEGF, Day 1            | 48/3 (5.8%)   | 53/53 (0.52)        | 58/67 (0.77)        | 4/4 (0.82) | 54/67 (0.67)  | 21/0 (0.37)  |
| VEGF, Day 5            | 49/0 (0%)     | -                   | -                   | -          | -             | -            |
| IFN- $\gamma$ , Day 1  | 34/17 (33.3%) | 53/56 (0.21)        | 53/71 (0.22)        | 4/4 (0.79) | 50/65 (0.32)  | 21/18 (0.80) |
| IFN- $\gamma$ , Day 5  | 32/17 (34.6%) | 52/56 (0.20)        | 50/70 (0.16)        | 3/4 (0.92) | 46/64 (0.23)  | 18/17 (0.92) |
| IFN- $\alpha$ , Day 1  | 49/2 (3.9%)   | 53/55 (0.69)        | 57/100 (0.22)       | 4/5 (0.53) | 53/100 (0.19) | 20/0 (0.47)  |
| IFN- $\alpha$ , Day 5  | 47/2 (4.0%)   | 53/47 (0.61)        | 55/100 (0.21)       | 4/2 (0.07) | 53/50 (0.92)  | 19/0 (0.49)  |
| IL-1R $\alpha$ , Day 1 | 46/5 (9.8%)   | 53/40 (0.47)        | 63/20 (0.06)        | 4/3 (0.07) | 59/20 (0.09)  | 20/20 (0.98) |
| IL-1R $\alpha$ , Day 5 | 46/3 (6.1%)   | 53/39 (0.13)        | 58/33 (0.39)        | 4/3 (0.89) | 52/66 (0.62)  | 17/33 (0.49) |
| TNF- $\alpha$ , Day 1  | 18/33 (64.7%) | 42/56 <b>(0.02)</b> | 61/58 (0.80)        | 3/4 (0.27) | 44/61 (0.26)  | 22/18 (0.72) |
| TNF- $\alpha$ , Day 5  | 18/31 (63.2%) | 42/56 <b>(0.03)</b> | 61/ 54 (0.66)       | 3/4 (0.37) | 44/58 (0.35)  | 22/16 (0.59) |
| IL-2, Day 1            | 36/15 (29.4%) | 52/56 (0.10)        | 50/80 <b>(0.04)</b> | 4/4 (0.53) | 53/60 (0.63)  | 22/13 (0.46) |

|              |               |              |               |            |                      |                      |
|--------------|---------------|--------------|---------------|------------|----------------------|----------------------|
| IL-2, Day 5  | 30/19 (38.7%) | 53/53 (0.43) | 46/73 (0.06)  | 3/4 (0.97) | 46/63 (0.26)         | 20/15 (0.71)         |
| IL-7, Day 1  | 48/3 (5.8%)   | 53/53 (0.65) | 54/67 (0.77)  | 4/6 (0.52) | 28/0 ( <b>0.04</b> ) | 21/0 (0.37)          |
| IL-7, Day 5  | 39/10 (20.4%) | 53/54 (0.24) | 56/60 (0.83)  | 4/4 (0.66) | 51/60 (0.62)         | 15/30 (0.28)         |
| IP-10, Day 1 | 28/23 (45%)   | 52/54 (0.23) | 64/52 (0.38)  | 3/4 (0.99) | 54/57 (0.83)         | 11/30 (0.07)         |
| IP-10, Day 5 | 23/26 (53.0%) | 51/54 (0.16) | 56/57 (0.93)  | 3/4 (0.92) | 52/53 (0.90)         | 30/7 ( <b>0.04</b> ) |
| IL-2R, Day 1 | 49/2 (3.9%)   | 53/54 (0.90) | 61/0 (0.08)   | 4/5 (0.56) | 53/100 (0.19)        | 20/0 (0.47)          |
| IL-2R, Day 5 | 45/4 (8.1%)   | 53/66 (0.12) | 57/50 (0.76)  | 4/4 (0.94) | 48/100 (0.05)        | 20/0 (0.32)          |
| MIG, Day 1   | 43/8 (15.6%)  | 53/58 (0.69) | 61/50 (0.58)  | 4/5 (0.79) | 54/63 (0.63)         | 21/12 (0.58)         |
| MIG, Day 5   | 39/10 (20.4%) | 53/52 (0.71) | 61/40 (0.21)  | 4/4 (0.65) | 56/40 (0.35)         | 17/20 (0.88)         |
| IL-4, Day 1  | 3/48 (94.1%)  | 42/53 (0.47) | 33/60 (0.35)  | 3/4 (0.58) | 100/52 (0.10)        | 0/20 (0.37)          |
| IL-4, Day 5  | 3/46 (93.8%)  | 51/53 (0.96) | 66/56 (0.73)  | 4/4 (0.73) | 66/52 (0.62)         | 33/17 (0.49)         |
| IL-8, Day 1  | 48/3 (5.8%)   | 53/39 (0.07) | 60/33 (0.35)  | 4/3 (0.58) | 54/67 (0.67)         | 20/0 (0.37)          |
| IL-8, Day 5  | 48/1 (2.0%)   | 53/51 (0.75) | 56/100 (0.38) | 4/2 (0.21) | 54/0 (0.28)          | 18/0 (0.63)          |

---

Data are expressed as medians. Comparisons between complete and incomplete data were made using Mann-Whitney U for continuous variables.

Bold values denote statistical significance at the  $p \leq 0.05$  level.

Acute kidney injury (AKI); fibroblast growth factor (FGF); granulocyte colony-stimulating factor (G-CSF); granulocyte/macrophage-colony stimulating factor (GM-CSF); RANTES (regulated on activation, normal T cell expressed and secreted); macrophage inflammatory protein (MIP); monocyte chemoattractant protein-1 (MCP-1); epidermal growth factor (EGF); hepatocyte growth factor (HGF); vascular endothelial growth factor (VEGF); interferon alpha (IFN- $\alpha$ ); interferon-gamma-inducible protein 10 (IP-10); monokine induced by IFN- $\gamma$  (MIG); interleukin (IL); IL-1 receptor (IL-1R).

Day 1: day of admission to critical care areas; Day 5: the fifth day in critical care areas.

\*Missing values were those outside the ranges specified by the Luminex manufacturer. Missing values were imputed according to a practical guide for multiple imputation of missing data in nephrology [41].
